# Supplementary material for: Molecular recognition with cyclodextrin polymer: a novel method for removing sulfides efficiently
Source: Royal Society of Chemistry journal article supplement (doi:10.1039/c7ra06782h), 2017-01-01
Supplement: c7ra06782h1.pdf [file c7ra06782h1.pdf]

## Supporting Information

### Molecular recognition with cyclodextrin polymer: a novel method for removing sulfides efficiently

Linlin Li, Zunbin Duan, Jinshe Chen, Yulu Zhou, Lijun Zhu, Yuzhi Xiang, and Daohong Xia\*

State Key Laboratory of Heavy Oil Processing, China University of Petroleum, Qingdao 266580, People's Republic of China

\*Corresponding Author: [xiadh@upc.edu.cn](mailto:xiadh@upc.edu.cn).

#### Figures:

**Figure S1.** The TG curves of (A)  $\alpha$ -CDP, (B)  $\beta$ -CDP, (C)  $\gamma$ -CDP, (D) ( $\beta$ & $\gamma$ )-CDP.

**Figure S2.**  $^{13}\text{C}$  solid-state NMR of (a)  $\alpha$ -CDP, (b)  $\beta$ -CDP, (c)  $\gamma$ -CD, (d) ( $\beta$ & $\gamma$ )-CDP.

**Figure S3.** Regeneration performance of  $\beta$ -CDP for removing DBT.

**Figure S4.** Pseudo-second order kinetic of  $\beta$ -CDP for DBT.

**Figure S5** Nitrogen adsorption isotherms of (A) fresh  $\beta$ -CDP and (B) used  $\beta$ -CDP.

**Figure S6** FTIR spectra of (a) used  $\beta$ -CDP and (b) fresh  $\beta$ -CDP.

#### Equation E1:

Equation of The desulfurization efficiency in Table S1.

#### Tables:

**Table S1.** The desulfurization selectivity to DBT of  $\beta$ -CDP.

#### Figures:

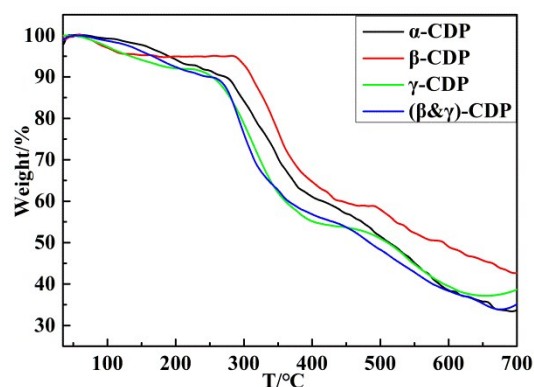

**Figure S1** The TG curves of (A)  $\alpha$ -CDP, (B)  $\beta$ -CDP, (C)  $\gamma$ -CDP, (D) ( $\beta$ & $\gamma$ )-CDP.

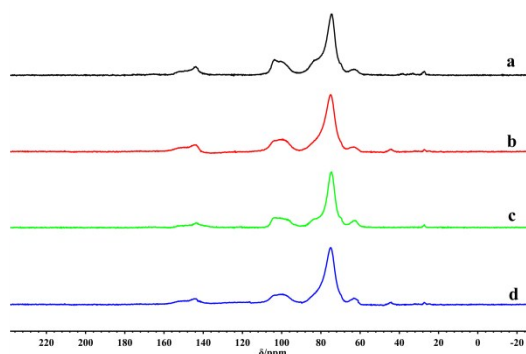

**Figure S2**  $^{13}\text{C}$  solid-state NMR of (a)  $\alpha$ -CDP, (b)  $\beta$ -CDP, (c)  $\gamma$ -CD, (d) ( $\beta$ & $\gamma$ )-CDP.

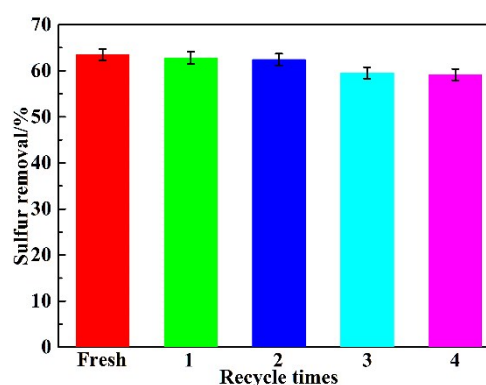

**Figure S3** Regeneration performance of  $\beta$ -CDP for removing DBT.

Desulfurization conditions: temperature=25 °C, time=2h, mass ration of  $\beta$ -CDP to n-heptane solution of DBT is 1:40, initial sulfur concentration is 100  $\mu\text{g g}^{-1}$ . All results were obtained in triplicate, and standard deviation is indicated by the error bars.

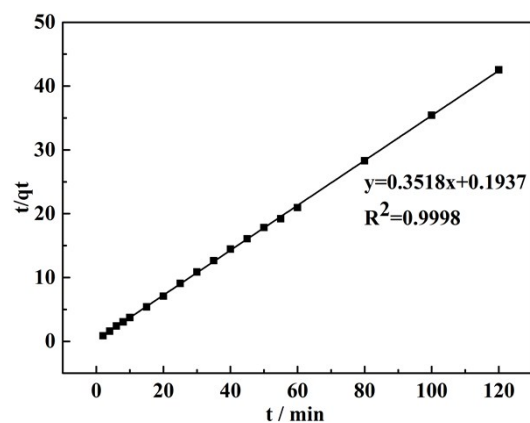

**Figure S4** Pseudo-second order kinetic of  $\beta$ -CDP for DBT.

Desulfurization conditions: temperature=25°C, time=2h, mass ration of  $\beta$ -CDP to n-heptane solution of DBT is 1:40.

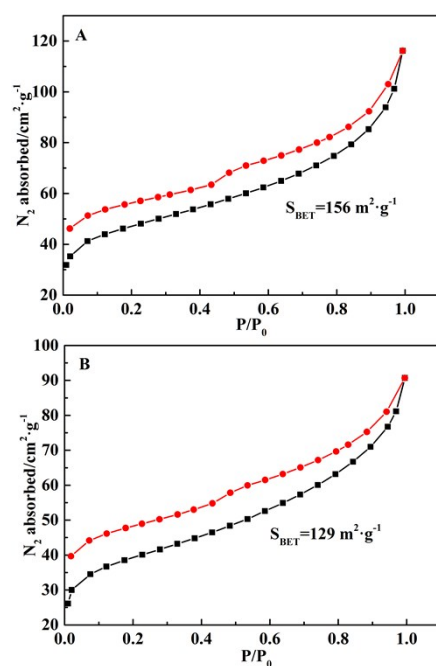

**Figure S5** Nitrogen adsorption isotherms of (A) fresh  $\beta$ -CDP and (B) used  $\beta$ -CDP.

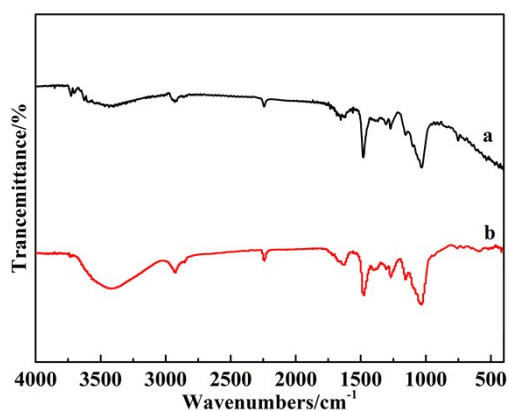

**Figure S6** FTIR spectra of (a) used  $\beta$ -CDP and (b) fresh  $\beta$ -CDP.

**Equation E1:**

The desulfurization efficiency in Table S1 was calculated according to the following equation (E1).

$$Y = 100\% (S_0 - S_t) / S_0 \quad \text{E1}$$

Where Y is the desulfurization efficiency for DBT,  $S_0$  ( $\mu\text{g/g}$ ) is the initial sulfur concentration of DBT in n-heptane solution, and  $S_t$  ( $\mu\text{g/g}$ ) is the sulfur concentration of DBT in n-heptane solution after desulfurization.

**Tables:****Table S1.** The desulfurization selectivity to DBT of  $\beta$ -CDP.

|   | Before desulfurization/ $\mu\text{g} \cdot \text{g}^{-1}$ |      |                | After desulfurization/ $\mu\text{g} \cdot \text{g}^{-1}$ |                | DBT removal/% |
|---|-----------------------------------------------------------|------|----------------|----------------------------------------------------------|----------------|---------------|
|   | Total                                                     | DBT  | Other sulfides | DBT                                                      | Other sulfides |               |
| A | 94.7                                                      | 17.5 | 77.2           | 1.5                                                      | 49.0           | 91.4          |
| B | 98.8                                                      | 63.8 | 33.0           | 7.7                                                      | 31.5           | 87.9          |

A: The sulfur concentration ratio of DBT:BT:Th:TP:EPS was 1:1:1:1:1

B: The sulfur concentration ratio of DBT:BT:Th:TP:EPS was 6:1:1:1:1

Desulfurization conditions: temperature=25°C, time=2h, mass ratio of  $\beta$ -CDP to n-heptane solution of mixed-sulfides is 1:20.
